# Supplementary material
Source: publisher site journal article supplement (https://www.dovepress.com/article/458643)
Supplement: Supplementary file 1 [file get_supplementary_file.php]

## Supplement

**Table S1. Interview Guide**

| German original text                                                                                                                                                                                                                                                                                                                                                                                                                                                                                                                                                                                                                                                                                                                                                                                                                                   | English translation                                                                                                                                                                                                                                                                                                                                                                                                                                                                                                                                                                                                                                                                                                                                                      |
|--------------------------------------------------------------------------------------------------------------------------------------------------------------------------------------------------------------------------------------------------------------------------------------------------------------------------------------------------------------------------------------------------------------------------------------------------------------------------------------------------------------------------------------------------------------------------------------------------------------------------------------------------------------------------------------------------------------------------------------------------------------------------------------------------------------------------------------------------------|--------------------------------------------------------------------------------------------------------------------------------------------------------------------------------------------------------------------------------------------------------------------------------------------------------------------------------------------------------------------------------------------------------------------------------------------------------------------------------------------------------------------------------------------------------------------------------------------------------------------------------------------------------------------------------------------------------------------------------------------------------------------------|
| <p><i>Vor dem Interview: Fragen, ob Patient*in bereit ist, einige Fragen zu beantworten und ob das Gespräch aufgezeichnet werden kann (Information, dass dies nur dazu dient, nicht mitschreiben zu müssen, und dass Daten und Aufnahme wie alle anderen Daten in der Studie vertraulich behandelt werden).</i></p>                                                                                                                                                                                                                                                                                                                                                                                                                                                                                                                                    | <p><i>Before the interview: ask if patient is prepared to answer some questions and if the conversation may be recorded (inform them that this only serves for not having to write down everything and that the data and recording will be handled confidentially, just like all other study data).</i></p>                                                                                                                                                                                                                                                                                                                                                                                                                                                              |
| <p>Dann geht es jetzt los. Ich starte die Aufnahme und wiederhole wie eben besprochen noch einmal, dass dieses Gespräch aufgenommen und anschließend transkribiert, also wortwörtlich abgetippt wird. Die Aufnahme selbst wird nach Ende der Erhebungen gelöscht. Das Transkript wird in pseudonymisierter Form, also so, dass es nicht mehr mit Ihrer Person in Verbindung zu bringen ist, bis zu 10 Jahre nach der Datenauswertung bzw. dem Erscheinen der Publikation gespeichert. Bis zu diesem Zeitpunkt können Sie jederzeit Ihre Erlaubnis zur Speicherung der Daten widerrufen. Im Falle einer Ablehnung der Tonaufnahme oder eines Rücktritts entstehen für Sie keinerlei Kosten oder anderweitige Nachteile. Die pseudonymisierten Daten werden ausschließlich zu Forschungszwecken verwendet. Sind Sie mit der Teilnahme einverstanden?</p> | <p>Then here we go. I start the recording and repeat as we have just discussed that this conversation will be recorded and afterwards transcribed, that is typed verbatim. The recording itself will be deleted at the end of data collection. The transcript will be pseudonymized, meaning that it cannot be connected to your ID anymore. The pseudonymized transcript will be saved up to 10 years after data analysis or publication. Up until that timepoint you can at any time retract your permission for saving the data. In case of refusing the recording or a withdrawal of consent there will be no costs or other disadvantages for you. The pseudonymized data will only be used for research.</p> <p>Are you giving your consent for participating?</p> |
| <p>Was <b>denken Sie heute</b> über Ihre Schuppenflechte?</p> <ul style="list-style-type: none"><li>• Welche Beschwerden haben Sie momentan aufgrund Ihrer Schuppenflechte?<ul style="list-style-type: none"><li>○ Jeweils hinsichtlich Schmerz, Juckreiz, Lebensqualität und Hautläsionen?</li></ul></li></ul>                                                                                                                                                                                                                                                                                                                                                                                                                                                                                                                                        | <p>What do you <b>think</b> about your psoriasis <b>today</b>?</p> <ul style="list-style-type: none"><li>• Which complaints do you currently have due to your psoriasis?<ul style="list-style-type: none"><li>○ With regard to pain, itch, quality of life and skin lesions?</li></ul></li></ul>                                                                                                                                                                                                                                                                                                                                                                                                                                                                         |

---

Was dachten Sie über Ihre Schuppenflechte, **bevor Sie die Behandlung** bei uns begonnen haben?

- Welche Beschwerden hatten Sie damals (aufgrund Ihrer Schuppenflechte)?
  - Jeweils hinsichtlich Schmerz, Juckreiz, Lebensqualität und Hautläsionen?

What did you think about your psoriasis **before starting your treatment** here?

- Which complaints did you have back then (because of your psoriasis)?
  - With regard to pain, itch, quality of life and skin lesions?

---

Welche Erfahrungen haben Sie in der Vergangenheit bereits mit Behandlungen der Schuppenflechte gemacht?

- Welche positiven Erfahrungen haben Sie gemacht?
- Welche negativen Erfahrungen haben Sie gemacht?

What were your past experiences with the treatment of your psoriasis?

- Which positive experiences have you had?
- Which negative experiences have you had?

---

Inwiefern haben sich Ihre Beschwerden aufgrund Ihrer Schuppenflechte im Laufe unserer Studie **verändert**?

In how far have your complaints due to your psoriasis **changed** over the course of our study?

---

Nun möchte ich Sie gerne etwas darüber fragen, welche Erwartungen Sie an die Behandlung im Rahmen dieser Studienteilnahme hatten.

Now I would like to ask you about your expectations with regard to the treatment within our study.

---

Zuerst möchte ich Sie fragen, welche **positiven Erwartungen** Sie an die Behandlung hatten?

- Hinsichtlich Beschwerden?
- Hinsichtlich weiterer Auswirkungen?

First I would like to ask which **positive expectations** you had towards the treatment?

- With regard to your complaints?
- With regard to other outcomes?

---

Welche **negativen Erwartungen** hatten Sie an die Behandlung?

- Hinsichtlich Beschwerden?
- Hinsichtlich weiterer Auswirkungen?

Which **negative expectations** did you had towards the treatment?

- With regard to your complaints?
- With regard to other outcomes?

---

Inwiefern haben sich Ihre Erwartungen an die Behandlung im Laufe der Studie **verändert**?

- In Bezug auf Ihre positiven Erwartungen?
- In Bezug auf Ihre negativen Erwartungen?

In how far have your expectations towards the treatment **changed** over the course of the study?

- With regard to your positive expectations?
- With regard to your negative expectations?

---

Welche Erwartungen hatten Sie in Bezug auf **Nebenwirkungen** der Behandlung?

Which expectations did you have with regard to **side effects** of the treatment?

---

Inwiefern haben sich Ihre Erwartungen hinsichtlich Nebenwirkungen **verändert**?

- Haben sich Ihre Erwartungen hinsichtlich Nebenwirkungen bestätigt?

In how far have your expectations towards side effects **changed** over the course of the study?

- Have your expectations towards side effects become true?
-

---

Jetzt sind wir am Ende der Studie. Was denken Sie über das **Ergebnis Ihrer Behandlung**?

- Welche positiven Gedanken haben Sie?
- Welche negativen Gedanken haben Sie?
- Inwiefern entspricht Ihr Ergebnis Ihren Erwartungen?
- Was ist möglicherweise anders als erwartet?

Now we are at the end of the study. What do you think of your **treatment outcome**?

- Which positive thoughts do you have?
- Which negative thoughts do you have?
- In how far does your outcome align with your expectations?
- What might be different from what you expected?

---

Welche Faktoren haben Ihrer Ansicht nach die **Wirksamkeit** der Behandlung beeinflusst?

- Gab es Faktoren, die sich förderlich auf die Wirksamkeit ausgewirkt haben?
  - Innerhalb der Studie?
  - Außerhalb der Studie?
- Gab es Faktoren, die sich hinderlich auf die Wirksamkeit ausgewirkt haben?
  - Innerhalb der Studie?
  - Außerhalb der Studie?

Which factors have in your opinion influenced the **effectiveness** of the treatment?

- Were there any factors that have supported treatment success?
  - Within the study?
  - Outside of the study?
- Were there any factors that have hindered treatment success?
  - Within the study?
  - Outside of the study?

---

Gibt es sonst noch etwas, das Sie uns über Ihre Erfahrungen und Erwartungen mitteilen möchten?

Is there anything else you would like to tell us about your experiences and expectations?

**Table S2. Descriptive data of groups formed by evaluative categories.**

|                                                   |                              | Number of patients | Gender % female | Age              | Disease duration |
|---------------------------------------------------|------------------------------|--------------------|-----------------|------------------|------------------|
| Clusters of expectations towards effectiveness    | 1: "Matched and stable"      | 8                  | 50.00           | 45.80<br>(15.80) | 11.80<br>(12.20) |
|                                                   | 2: "Not matched and adapted" | 7                  | 42.86           | 45.70<br>(16.00) | 8.29<br>(6.50)   |
|                                                   | 3: "Not matched but stable"  | 5                  | 40.00           | 34.20<br>(18.00) | 18.80<br>(6.95)  |
| Clusters of expectations towards side effects     | 1: "Matched and stable"      | 9                  | 33.33           | 50.30<br>(15.50) | 14.10<br>(18.40) |
|                                                   | 2: "Not matched and adapted" | 8                  | 28.57           | 31.00<br>(9.02)  | 9.67<br>(7.69)   |
|                                                   | 3: "Not matched but stable"  | 4                  | 75.00           | 47.00<br>(17.60) | 24<br>(15.50)    |
| Expectations towards effectiveness at study start | Partial remission            | 14                 | 57.14           | 42.00<br>(16.50) | 14.40<br>(12.50) |
|                                                   | Complete remission           | 5                  | 40.00           | 48.60<br>(16.20) | 9.80<br>(11.10)  |
| Expectations towards side effects at study start  | Absent                       | 9                  | 44.44           | 49.80<br>(15.50) | 16.70<br>(15.50) |
|                                                   | Present                      | 14                 | 42.86           | 41.10<br>(16.80) | 14.70<br>(16.80) |

Age and disease duration in years are given as mean values with standard deviations in brackets.
